# Supplementary material for: Ultra-Endurance Participation and Acute Kidney Injury: A Narrative Review
Source: MDPI journal article supplement (doi:10.3390/ijerph192416887), 2022-12-15
Supplement: s1 [file s1]

**Supplementary Table S1.** Overview of studies examining the occurrence of AKI, Exertional rhabdomyolysis, and Exercise-associated Hyponatremia in ultra-endurance athletes.

| Study        | Participants                                                     | Distance event                                     | Pre-race measures                                                                                 | Measures at presentation                                                                                                                                                                                                                                                                           | Results                                                                                                | Environmental conditions                                                                          | Return to baseline/ Renal follow up info                     | NSAIDs (Y/N)                                                                                                                                                                             | Supplements                                                                                                                                           |
|--------------|------------------------------------------------------------------|----------------------------------------------------|---------------------------------------------------------------------------------------------------|----------------------------------------------------------------------------------------------------------------------------------------------------------------------------------------------------------------------------------------------------------------------------------------------------|--------------------------------------------------------------------------------------------------------|---------------------------------------------------------------------------------------------------|--------------------------------------------------------------|------------------------------------------------------------------------------------------------------------------------------------------------------------------------------------------|-------------------------------------------------------------------------------------------------------------------------------------------------------|
| Boulter 2011 | Active male (n = 4) (Age: 35 ± 6y)<br>3/4 = novice ultra-runners | 89.3 km, endurance running                         | Not measured                                                                                      | 3/4 = delayed presentation to medical staff<br>3/4 = vomiting & muscle soreness<br>Initial blood samples:<br>3/4 = hyponatraemic (blood sodium concentrations <135 mEq/l)<br>2/4 = hypochloraemic (blood chloride concentrations <98 mEq/l)<br>S-CK (5718–54,231 UI/L)<br>S-Cr (2.99– 12.88 mg/dL) | ER+ AKI<br><br>4/4 - Rhabdomyolysis - presented 1-4 days post-race<br><br>3/4 – EAH<br><br>4/4 – AKI   | 14–24°C,<br>63% relative humidity                                                                 | Hospitalization and acute renal dialysis – between 2-21 days | 3/4 = NSAIDs during race<br>1/4 = analgesic/muscle relaxant (Besemax; 450 mg paracetamol and 35 mg orphenadrine citrate) during and Voltaren (NSAID) prior to the race for a knee injury | All = anti-cramp electrolyte supplement (sodium, potassium, magnesium and calcium) 6 to 16 tablets, with an average intake of 11 tablets (1 per hour) |
| Bruo 2010    | Active males (n = 5) (Age: 36.7 ± 7.8 y)                         | 161 km, 5500 m cumulative climb, endurance running | Not measured                                                                                      | Muscle soreness<br>Dark urine<br>S-Cr (1.1–4.9 mg/ dL)<br>S-CK (38,218– 95,940 UI/L)                                                                                                                                                                                                               | 5 cases of EAH<br>5 cases of ER<br>3/5 progressed to AKI- failure                                      | 15–37°C                                                                                           | Intravenous fluids<br>Hospitalization                        | 4/5 = positive NSAIDs during race                                                                                                                                                        | NS                                                                                                                                                    |
| Hou 2015     | Active males (n = 26)                                            | 100 km Ultramarathon                               | BUN (mmol/L) - 15.23 ± 2.89<br>Creatinine (mmol/L)- 0.94 ± 0.11<br>Myoglobin (µg/L)- 48.9 ± 20.63 | BUN (mmol/L) - 24.04 ± 5.49<br>Creatinine (mmol/L)- 1.56 ± 0.39<br>Myoglobin (µg/L)- 4462.46 ± 3391.87<br>CK (U/L) - 4274.81 ± 5903.85                                                                                                                                                             | 26 = ER<br>22/26 = AKI<br>18 =Stage I AKI<br>4 =stage II AKI<br><br>Faster run = increased risk of AKI | Temperature - 24.9°C (7–8 AM) and 28.7°C (5–6 PM)<br>relative humidity was between 66% (10–11 AM) | NS                                                           | Positive history of NSAIDs but NS                                                                                                                                                        | NS                                                                                                                                                    |

|                         |                                                     |                                                                                                                                                                           |                                                                     |                                                                                                                                                                                                                                                                                                                                                                                |                                                                                                                                                                                              |                                                                                                                      |                                                         |    |    |
|-------------------------|-----------------------------------------------------|---------------------------------------------------------------------------------------------------------------------------------------------------------------------------|---------------------------------------------------------------------|--------------------------------------------------------------------------------------------------------------------------------------------------------------------------------------------------------------------------------------------------------------------------------------------------------------------------------------------------------------------------------|----------------------------------------------------------------------------------------------------------------------------------------------------------------------------------------------|----------------------------------------------------------------------------------------------------------------------|---------------------------------------------------------|----|----|
|                         |                                                     |                                                                                                                                                                           | CK (U/L) - 166.73<br>± 96.91                                        |                                                                                                                                                                                                                                                                                                                                                                                |                                                                                                                                                                                              | and 87% (8–9<br>AM                                                                                                   |                                                         |    |    |
| Hoffman &<br>Weiss 2016 | Active<br>runners (n =<br>627)                      | 161 km, 5500<br>m cumulative<br>climb,<br>Ultramaratho<br>n                                                                                                               | NS                                                                  | S-CK (120–200,000<br>IU/L)<br>S-Cr (0.4–2.2 mg/ dL)                                                                                                                                                                                                                                                                                                                            | AKI<br><br>227 (36.2%) =<br>AKI risk<br>31 (4.9%) =<br>AKI                                                                                                                                   | Outlined in<br>previous refs                                                                                         | NS                                                      | NS |    |
| Lipman 2014             | Active<br>runners (n =<br>30)                       | Ultramaratho<br>n (7 days-6<br>stages-177<br>km)                                                                                                                          | SCr (mg/dl) - 0.9<br>± 0.2<br>GFR (mg/dl) -<br>102.7 ± 17.3         | Stage 1 finish –<br>SCr (mg/dl) - 1.4 ± 0.4<br>GFR (mg/dl) - 76.6 ±<br>18.3<br>ΔGFR (mg/dl) - 32.5 ±<br>18.9 (p = 0.002)<br>Stage 3 finish –<br>SCr (mg/dl) - 1.3 ± 0.4<br>GFR (mg/dl) - 74.5 ±<br>17.2<br>ΔGFR (mg/dl) - 28.1 ±<br>20 (p = 0.002)<br>Stage 5 finish –<br>SCr (mg/dl) - 1.4 ± 0.3<br>GFR (mg/dl) - 71.8 ±<br>19.6<br>ΔGFR (mg/dl) - 30.9 ±<br>17.5 (p < 0.001) | AKI = 55–85%<br>all<br>participants<br>meet RIFLE<br>criteria<br><br>stage 1:<br>AKI risk = 13<br>AKI = 3<br><br>stage 3:<br>AKI risk = 10<br>AKI = 2<br>stage 5:<br>AKI risk = 8<br>AKI = 1 | NS                                                                                                                   | Before the start<br>of each new<br>stage<br>After 24hrs | NS | NS |
| Kao 2015                | Active males<br>(n = 26)<br>(age: 49y<br>[22–60 y]) | 100k<br>ultramaratho<br>n -not strict<br>entry<br>requirements<br>-first ultra-<br>event on<br>400m running<br>track<br>organised in<br>Taiwan- to<br>increase<br>entries | S- CK (U/L) - 146<br>(112-207)<br>SCr (mg/dL) -<br>0.91 (0.87-1.03) | S-CK - 2299 (1497-4650<br>UI/L)<br>S-Cr - 1.50 (1.25-1.77<br>mg/dL)<br>17/26 = moderate<br>dehydration<br>6/26 = muscle cramps<br>3/26 = haematuria                                                                                                                                                                                                                            | AKI = 22/26<br>subjects<br>(85%)<br>immediately<br>after race<br>4/26 = no AKI<br>18/26 = stage<br>I AKI<br>4/26 (15%) =<br>stage II AKI                                                     | temperature<br>ranged from<br>24.9–28.7°C<br>average<br>humidity<br>between 66%<br>(10-11 AM)<br>and 87% (8-9<br>AM) | 1 day<br>hospitalization                                | NS | NS |

|            |                                  |                                                                         |                                                                                                 |                                                                                                                                                                                                                                                                                                                                                                                                                                                                             |                                                                                                                                                                                          |                      |    |                                              |    |
|------------|----------------------------------|-------------------------------------------------------------------------|-------------------------------------------------------------------------------------------------|-----------------------------------------------------------------------------------------------------------------------------------------------------------------------------------------------------------------------------------------------------------------------------------------------------------------------------------------------------------------------------------------------------------------------------------------------------------------------------|------------------------------------------------------------------------------------------------------------------------------------------------------------------------------------------|----------------------|----|----------------------------------------------|----|
|            |                                  | Best marathon time= <4hrs<br>All except 2 had done 1 ultra-event before |                                                                                                 |                                                                                                                                                                                                                                                                                                                                                                                                                                                                             |                                                                                                                                                                                          |                      |    |                                              |    |
| Belli 2018 | Active males (n = 6)             | Brazil 135 Ultramarathon (217km)                                        | S-CK (U/L) – 132 ± 18<br>SCr (mg/dL) – 1.00 ± 0.03<br>GFR (ml/min/1.73m <sup>2</sup> ) – 89 ± 5 | At 134km (equivalent flat distance)<br>S-CK (U/L) – 3988 ± 1004<br>S-Cr (mg/ dL) – 1.34 ± 0.1<br>GFR (ml/min/1.73m <sup>2</sup> ) – 66 ± 8<br><br>At 279Km (equivalent flat distance)<br>S-CK (U/L) – 18667 ± 10664<br>S-Cr (mg/ dL) – 1.27 ± 0.08<br>GFR (ml/min/1.73m <sup>2</sup> ) – 69 ± 5<br><br>At 339Km (equivalent flat distance)<br>S-CK (U/L) – 19157 ± 12369<br>S-Cr (mg/ dL) – 1.33 ± 0.08<br>GFR (ml/min/1.73m <sup>2</sup> ) – 65 ± 5<br><br>Muscle soreness | AKI - meet the risk criteria for acute kidney injury from 84 km until they finished the race<br>SCr change did not meet AKI criteria<br>GFR change did meet AKI criteria (>25% decrease) | 8–30°C               | NS | Negative use of daily medication - NSAIDs NS | NS |
| Shin 2016  | Active male runner (n =50) (Age: | Marathon (n=17),                                                        | BUN Marathon - 17.70±4.24                                                                       | Post BUN Marathon - 22.79±5.58                                                                                                                                                                                                                                                                                                                                                                                                                                              | Indication of reduced renal function                                                                                                                                                     | Starting temperature | NS | NS                                           | NS |

|               |                     |                                               |                                                                                                                                                                                                                        |                                                                                                                                                                                                                                                                                 |                                                                                                                |                                 |                                                                                                                                                                                                                          |                                                                              |                                                                                                                                                                                               |
|---------------|---------------------|-----------------------------------------------|------------------------------------------------------------------------------------------------------------------------------------------------------------------------------------------------------------------------|---------------------------------------------------------------------------------------------------------------------------------------------------------------------------------------------------------------------------------------------------------------------------------|----------------------------------------------------------------------------------------------------------------|---------------------------------|--------------------------------------------------------------------------------------------------------------------------------------------------------------------------------------------------------------------------|------------------------------------------------------------------------------|-----------------------------------------------------------------------------------------------------------------------------------------------------------------------------------------------|
|               | 51.76 ± 6.88y)      | 100 km (n=17) and 308 (n=16) km ultramarathon | 100 km- 17.34±3.69<br>308 km - 17.01±4.31<br><br>Creatinine<br>Marathon - 1.06±0.10<br>100 km- 1.07±0.11<br>308 km - 1.03±0.05<br><br>S-CK<br>Marathon - 132.76±55.17<br>100 km- 108.58±40.76<br>308 km - 131.75±39.34 | 100 km- 32.31±4.87<br>308 km - 24.03±4.88<br><br>Creatinine<br>Marathon - 1.27±0.17<br>100 km- 1.27±0.24<br>308 km - 1.07±0.09<br><br>S-CK<br>Marathon - 274.17±70.95<br>100 km- 2983.17±5.56<br>308 km - 4970.31±2222.48                                                       | Change in SCr significantly higher after marathon and 100km ultra (medium to high intensity) compared to 308km | (20-23°C) and humidity (40-50%) |                                                                                                                                                                                                                          |                                                                              |                                                                                                                                                                                               |
| Zyl-Smit 2000 | Male 1 40 years old | Comrades Ultramarathon                        | NS                                                                                                                                                                                                                     | 1= delayed presentation to medical staff – 9 days post-race<br><br>10 days post-race - SCr- 713 µmol/L, urea 32.7 mrnol/l, potassium CK- NS<br>Urine- 2+ protein 1+ blood, moderate granular casts<br><br>Ultrasound = bilaterally unobstructed and moderately enlarged kidneys | Rhabdomyolysis (presumed)<br><br>acute tubular necrosis (ATN) and ARF                                          | NS                              | treatment = Furosemide 250 mg intravenously followed by similar oral dose, hypertension - nifedipine 10 mg, 8-hourly<br><br>5 days post-presentation- plasma creatinine reduced - 260 µmol/l<br><br>After 10 days plasma | During race - 6 x paracetamol 500 mg/chlormezanone 100 mg (Bessenol) tablets | 1 x 2 mg loperamide (Imodium) tablet before the race<br>Day 1 post race = 2 Bessenol tablets following 5 days - 11 Stopayne tablets (paracetamol / caffeine/ codeine phosphate / meprobamate) |

|               |                                                      |                                    |                                                                     |                                                                                                                                                                                                                                                                                                                                                                                                      |                                                                                                                                                                                |                            |                                                                         |    |    |
|---------------|------------------------------------------------------|------------------------------------|---------------------------------------------------------------------|------------------------------------------------------------------------------------------------------------------------------------------------------------------------------------------------------------------------------------------------------------------------------------------------------------------------------------------------------------------------------------------------------|--------------------------------------------------------------------------------------------------------------------------------------------------------------------------------|----------------------------|-------------------------------------------------------------------------|----|----|
|               |                                                      |                                    |                                                                     |                                                                                                                                                                                                                                                                                                                                                                                                      |                                                                                                                                                                                |                            | creatinine = 93<br>μmol/l &<br>creatinine<br>clearance = 102<br>ml/ min |    |    |
| Jouffroy 2019 | n = 47<br>43 ± 7 years                               | Ultra-distance<br>race 80km        | SCr - 90±14<br>μmol/L (km0)<br><br>SUrea - 4.7±4.5<br>mmol/L (km 0) | SCr increased to<br>136±32 μmol/ L (km<br>80—p<0.0001) = 52%<br>increase<br>Mean SUrea increased<br>to 22.8±12.0 mmol/L<br>(km 80) (p<0.0001)<br><br>NGAL and Kidney injury<br>molecule 1 (KIM-1)<br>shown to progressively<br>increase during race<br>(p<0.05 vs baseline)<br>At day 9 NGAL and<br>KIM1 urinary levels<br>decreased but<br>remained significantly<br>higher than baseline<br>levels | 21km<br>2 (4%) = stage<br>1<br>0 = stages 2/3<br><br>53km<br>5 (11%) =<br>stage 1<br>1 (2%) = stage<br>2<br>0 = stage 3<br><br>80km<br>3 (6%) = stage<br>1<br>0 = stages 2/3   | +14°C and<br>clear weather | Day 9 – no<br>significant<br>difference from<br>baseline                | NS | NS |
| Lipman 2016   | 128 (28%<br>women,<br>mean age<br>39.6 ± 9<br>years) | 4 Multistage<br>ultramaratho<br>ns | Baseline SCr -<br>0.72 (0.49 to<br>0.89) SD ±0.13<br>mg/dL          | Stage 1 SCr - 1.20 (0.70<br>to 2.30) SD ± 0.28<br>mg/dL<br>Stage 3 SCr - 1.33 (0.70<br>to 2.90) SD ±<br>0.37mg/dL<br>Stage 5 SCr - 1.28 (0.70<br>to 2.70) SD ± 0.34<br>mg/dL<br>Mean SCr change at<br>Stage 1 - 0.49 (0.02 to<br>1.54)<br>± 0.26<br>Stage 3 - 0.12 (20.50 to<br>1.50)<br>± 0.26                                                                                                      | AKI status at<br>Stages<br><br>Stage 1 –<br>Normal =<br>37.5%<br>Risk AKI =<br>43.8%<br>AKI = 18.8%<br><br>Stage 3-<br>Normal =<br>20.3%<br>Risk AKI =<br>47.7%<br>AKI = 32.0% | NS                         | NA                                                                      | NS | NS |

|              |                                              |                  |                                                         |                                                        |                                                                                                                                                                                                                                                                                                                  |  |    |                                                                                                                                                                                               |  |
|--------------|----------------------------------------------|------------------|---------------------------------------------------------|--------------------------------------------------------|------------------------------------------------------------------------------------------------------------------------------------------------------------------------------------------------------------------------------------------------------------------------------------------------------------------|--|----|-----------------------------------------------------------------------------------------------------------------------------------------------------------------------------------------------|--|
|              |                                              |                  |                                                         | Stage 5 - -0.05 (21.0 to 0.50)<br>± 0.24               | <p>Stage 5-<br/>Normal = 23.4%<br/>Risk AKI = 48.4%<br/>AKI = 28.1%</p> <p>per stage prevalence of AKI = 62.5% to 79.7%.</p> <p>Slowest race finishers who were less likely to develop AKI, 82% less likely than those who finished in the top 10%.</p> <p>Multivariate analysis found AKI was significantly</p> |  |    |                                                                                                                                                                                               |  |
| Khodaei 2021 | 64, only 37 (both pre-and post-race results) | 100km ultra race | mean (±SD) pre-race Cr – (n = 64) was 0.99 ± 0.15 mg/dL | Serum BUN and Cr increased (P < .001) post-race (n=37) | <p>18 out of the 37 (49%) met the criteria for AKI.</p> <p>Using fixed eGFR of 75 ml/ min per 1.73 m2 and an aged-based eGFR), resulted in 6 (16%) and 22 (59%) of 37</p>                                                                                                                                        |  | NA | <p>Positive use of NSAIDS<br/>NSAID 1-2 days prior to race =<br/>18 AKI- n=3 yes<br/>19 Not AKI – n=4<br/>Yes</p> <p>NSAIDS during race-<br/>18 AKI- n=4 yes<br/>19 Not AKI – n=4<br/>Yes</p> |  |

|             |                                                                                   |               |                                                                                                                                                                                                  |                                                                                                                                                                                                                                   |                                                                                                                                                                                                      |    |    |    |    |
|-------------|-----------------------------------------------------------------------------------|---------------|--------------------------------------------------------------------------------------------------------------------------------------------------------------------------------------------------|-----------------------------------------------------------------------------------------------------------------------------------------------------------------------------------------------------------------------------------|------------------------------------------------------------------------------------------------------------------------------------------------------------------------------------------------------|----|----|----|----|
|             |                                                                                   |               |                                                                                                                                                                                                  |                                                                                                                                                                                                                                   | runners =<br>criteria for<br>AKI,<br>respectively<br><br>Different<br>equations<br>produced<br>differing<br>results with<br>regard to the<br>number of<br>participants<br>meeting<br>criteria of AKI |    |    |    |    |
| Lippi 2012  | 16                                                                                | Ultramarathon | SCr (μmol/L) - 68<br>(58– 76)<br><br>eGFR,<br>mL/min/1.73 m <sup>2</sup><br>- 112 (97 – 133)<br><br>Serum NGAL,<br>ng/mL – 105 (86<br>– 158)<br><br>Urinary NGAL,<br>ng/mL - 4.4 (0.5<br>– 33.9) | SCr (μmol/L)- 98 (76-<br>118)<br>Mean Increase in SCr<br>(μmol/L) – 30<br><br>eGFR, mL/min/1.73 m <sup>2</sup><br>- 75 (57 – 99)<br><br>Serum NGAL, ng/mL –<br>196 (139 – 290)<br><br>Urinary NGAL, ng/mL -<br>35.6 (12.5 – 86.3) | All post-race<br>variables<br>significantly<br>different to<br>baseline<br>(p<0.001)<br><br>6 /16 athletes<br>(38 %), = AKI                                                                          | NS | NA | NS | NS |
| Noakes 1976 | 13<br>Group A –<br>complete<br>160Km<br>Group B –<br>completed<br>65 to 149<br>km | Ultramarathon | Group A<br>SCr- 1.1<br>(mg/100ml)<br>SUrea – 32.7<br>(mg/100ml)<br><br>Group B<br>SCr- 1.1<br>(mg/100ml)<br>SUrea – 30.2<br>(mg/100ml)                                                           | Group A<br>SCr- 1.5 (mg/100ml)<br>SUrea – 66.1<br>(mg/100ml)<br><br>Group B<br>SCr- 1.4 (mg/100ml)<br>SUrea – 52.7<br>(mg/100ml)                                                                                                  | SUrea =<br>doubled<br>SCr =<br>increased by<br>~1/3                                                                                                                                                  | NS | NS | NS | NS |

|                                                                                                                    |                                                                                          |                                  |                                                                                                                              |                                                                                                                                                                                                                                                                                                                                         |                                                                                                                                                                                                                                                                                                                                                      |                                                                                            |                                                                                                                                 |    |    |
|--------------------------------------------------------------------------------------------------------------------|------------------------------------------------------------------------------------------|----------------------------------|------------------------------------------------------------------------------------------------------------------------------|-----------------------------------------------------------------------------------------------------------------------------------------------------------------------------------------------------------------------------------------------------------------------------------------------------------------------------------------|------------------------------------------------------------------------------------------------------------------------------------------------------------------------------------------------------------------------------------------------------------------------------------------------------------------------------------------------------|--------------------------------------------------------------------------------------------|---------------------------------------------------------------------------------------------------------------------------------|----|----|
| Irving 1989                                                                                                        | 2 males<br>Experienced<br>marathon<br>runners                                            | 2-man 24 hr<br>relay<br>marathon | SCr ( $\mu\text{mol/L}$ ) –<br>81 & 86                                                                                       | Post-race SCr ( $\mu\text{mol/L}$ )<br>– 101 & 119<br>Repeated SCr ( $\mu\text{mol/L}$ )<br>at 48hrs- both 92<br>Increase in SCr<br>( $\mu\text{mol/L}$ ) – 20 & 23                                                                                                                                                                     | SCr increased<br>post-race<br><br>Cr clearance<br>dropped                                                                                                                                                                                                                                                                                            | range of Wet<br>Bulb Globe<br>Temperature<br>Index = 9.7-<br>16.3°C                        | Measures of<br>renal<br>dysfunction<br>transient as<br>normalised<br>after 24hr                                                 | NS | NS |
| Irving 1990 -<br>Transient<br>oliguria<br>with renal<br>tubular<br>dysfunction<br>after a 90<br>km running<br>race | 5 (Group = 4<br>males,<br>subject A = 1<br>female)<br>Experienced<br>marathon<br>runners | Ultramarathon<br>90Km            | Group<br>SCr ( $\mu\text{mol/L}$ ) -<br>63.5 ( $\pm 2.9$ )<br><br>Subject A<br>SCr ( $\mu\text{mol/L}$ ) -<br>42 ( $\pm 3$ ) | Group<br>Race SCr ( $\mu\text{mol/L}$ )- 69.3<br>( $\pm 9.6$ )<br>Day 2 SCr ( $\mu\text{mol/L}$ ) –<br>65.8 ( $\pm 5.5$ )<br>Day 14 SCr ( $\mu\text{mol/L}$ )-<br>62.0 ( $\pm 6.7$ )<br><br>Subject A<br>Race SCr ( $\mu\text{mol/L}$ )- 55.0<br>Day 2 SCr ( $\mu\text{mol/L}$ ) –<br>53.0<br>Day 14 SCr ( $\mu\text{mol/L}$ )-<br>51.0 | 1= collapsed<br>Subject A =<br>transient<br>oliguria with<br>renal tubular<br>dysfunction<br>and<br>anuria due to<br>restricted<br>fluid intake<br>during race<br>compared to<br>rest of group<br>= dehydration<br>(-11% body<br>weight) and<br>urine<br>creatinine<br>excretion<br>increase<br><br>Group =<br>Urine flow<br>rate, CrCl<br>unchanged | Mean<br>temperature –<br>17.9°C (10.5 –<br>21.5 °C)<br>Mean<br>humidity –<br>60% (9 – 41%) | Subject A =<br>Renal<br>dysfunction<br>measures<br>persisted 14<br>days post-race<br>although, full<br>recovery 1 year<br>later | NS | NS |
| Irving 1990 -<br>Plasma volume<br>and renal<br>function during<br>and after<br>ultramarathon<br>running            | 8 males<br>experienced<br>marathon<br>runners                                            | Ultramarathon                    | SCr ( $\mu\text{mol/L}$ ) - 91                                                                                               | Post-race SCr ( $\mu\text{mol/L}$ )-<br>110<br>Repeated SCr ( $\mu\text{mol/L}$ )<br>– at 24hrs = normal<br>Increase in SCr<br>( $\mu\text{mol/L}$ ) – 19                                                                                                                                                                               | SCr<br>significantly<br>increased on<br>race day<br>( $p < 0.001$ )                                                                                                                                                                                                                                                                                  | Mean<br>temperature –<br>12.5°C (7.3 –<br>18.3°C)                                          | Return to<br>baseline within<br>24Hrs                                                                                           | NS | NS |



|                     |                                                           |                                                                                 |                                                                                                                     |                                                                                                                                                                                                          |                                                                                                                                                                 |                                                                        |                                                                                           |    |    |
|---------------------|-----------------------------------------------------------|---------------------------------------------------------------------------------|---------------------------------------------------------------------------------------------------------------------|----------------------------------------------------------------------------------------------------------------------------------------------------------------------------------------------------------|-----------------------------------------------------------------------------------------------------------------------------------------------------------------|------------------------------------------------------------------------|-------------------------------------------------------------------------------------------|----|----|
| Neumayr<br>2003     | 28 (amateur<br>ultra-cyclists)                            | Ultramarathon<br>cycle                                                          | SCr ( $\mu\text{mol/L}$ ) - 88                                                                                      | Post-race SCr ( $\mu\text{mol/L}$ )-<br>106<br>Repeated SCr ( $\mu\text{mol/L}$ )<br>at 24hrs- 106<br>Increase in SCr<br>( $\mu\text{mol/L}$ ) - 18                                                      | SCr<br>significantly<br>elevated post-<br>race, 20%<br>( $p < 0.001$ )<br><br>Reduced renal<br>perfusion<br>mechanism<br>responsible<br>for renal<br>impairment | temperatures<br>ranged from<br>14–21°C, and<br>humidity from<br>55–85% | SCr remained<br>elevated at<br>24hrs                                                      | NS | NS |
| Neumayr<br>2015     | 16 (males,<br>world's best<br>ultramarathon<br>cyclists)  | Ultramarathon<br>cycle                                                          | SCr ( $\mu\text{mol/L}$ ) -<br>84 ( $\pm 15$ )                                                                      | Post-race SCr ( $\mu\text{mol/L}$ )-<br>111 ( $\pm 19$ )<br>Repeated SCr ( $\mu\text{mol/L}$ )<br>- 83 ( $\pm 15$ )<br>Increase in SCr<br>( $\mu\text{mol/L}$ ) - 26                                     | Significant<br>rise in SCr<br>(+33%,<br>$p < 0.001$ )<br>post-race<br><br>Reduced renal<br>perfusion<br>mechanism<br>responsible<br>for renal<br>impairment     | temperatures<br>ranged<br>between -1<br>and 20°C                       | SCr Normalised<br>within 24hrs                                                            | NS | NS |
| Christensen<br>2014 | 10                                                        | Ultramarathon                                                                   | SCr ( $\mu\text{mol/L}$ ) -<br>60                                                                                   | Post-race SCr ( $\mu\text{mol/L}$ )-<br>80<br>Mean Increase in SCr<br>( $\mu\text{mol/L}$ ) - 20                                                                                                         | lack of an<br>immediate<br>post-exercise<br>increase,<br>although<br>almost<br>significant ( $P$<br>= 0.075)                                                    | NS                                                                     | 25% increase in<br>SCr at 6 hours<br>post-race<br>Normalisation<br>at 48hrs post-<br>race | NS | NS |
| Chilbkova<br>2015   | 113 ultra-<br>runners and<br>ultra-<br>mountain<br>bikers | 24hr and<br>100km ultra-<br>running<br>and<br>24 hr and<br>multistage<br>ultra- | Male multistage<br>bikers<br>Plasma<br>creatinine = 0.9<br>$\pm 0.1$ (mg/dL)<br>Plasma<br>creatinine<br>clearance = | Male multistage bikers<br>Plasma creatinine =<br>1.2 $\pm$ 0.5 (mg/dL), +0.3<br>$\pm$ 0.5 (mg/dL), +33.3 $\pm$<br>64.8%, $p = 0.01$<br>Plasma creatinine<br>clearance = 8953.6 $\pm$<br>2447.9 (ml/min), | 13 (11.5%) -<br>EAH<br><br>6 (5%) - ER<br><br>2 (1.8%) -<br>EAH & ER                                                                                            | NS                                                                     | 2 cases of<br>elevated<br>creatinine = No<br>renal failure or<br>medical<br>intervention  | NS | NS |

|  |  |                        |                                                                                                                                                     |                                                                                                                                                                                                                                                   |                                                                                                  |  |  |  |  |
|--|--|------------------------|-----------------------------------------------------------------------------------------------------------------------------------------------------|---------------------------------------------------------------------------------------------------------------------------------------------------------------------------------------------------------------------------------------------------|--------------------------------------------------------------------------------------------------|--|--|--|--|
|  |  | mountain bike<br>races | 10849.4 ±<br>1502.9<br>1009.4 (ml/min)                                                                                                              | -1895.8 ± 2158.7<br>(ml/min), -17.4 ±<br>19.3%, p<0.01                                                                                                                                                                                            | All cases of<br>EAH and ER =<br>ultra-runners                                                    |  |  |  |  |
|  |  |                        | Male 24hrs<br>bikers<br>Plasma<br>creatinine = 0.9<br>± 0.1<br>207.5 (mg/dL)<br>Plasma<br>creatinine<br>clearance =<br>10657.2 ±<br>1614.2 (ml/min) | Male 24hrs bikers<br>Plasma creatinine = 1.2<br>± 0.2 (mg/dL), +0.3 ±<br>0.2(mg/dL), +32.7 ±<br>21.8%, p<0.01<br>Plasma creatinine<br>clearance = 9623.2 ±<br>1837.4(ml/min),<br>-1034.1 ±<br>1121.0(ml/min), -9.8 ±<br>11.7%, p<0.05             | 2 cases of<br>elevated<br>creatinine<br>>normal (~2.0<br>mg/dL or x1.5<br>estimated<br>baseline) |  |  |  |  |
|  |  |                        | Male 24hrs<br>runners<br>Plasma<br>creatinine = 0.9<br>± 0.1(mg/dL)<br>Plasma<br>creatinine<br>clearance =<br>10657.2 ±<br>1614.2(ml/min)           | Male 24hrs runners<br>Plasma creatinine = 0.9<br>± 0.2 (mg/dL), +0.0 ±<br>0.1(mg/dL), +10.6 ±<br>12.7%, p=0.06<br>Plasma creatinine<br>clearance = 9623.2 ±<br>1837.4(ml/min),<br>-1034.1 ±<br>1121.0(ml/min), -9.8 ±<br>11.7%, p<0.05            |                                                                                                  |  |  |  |  |
|  |  |                        | Male 100km<br>runners<br>Plasma<br>creatinine = 0.9<br>± 0.2(mg/dL)<br>Plasma<br>creatinine<br>clearance =<br>8985.3 ±<br>2219.0(ml/min)            | Male 100km runners<br>Plasma creatinine = 1.1<br>± 0.3<br>4357.1(mg/dL), +0.2 ±<br>0.3(mg/dL), + 25.8 ±<br>48.1%, p=0.05<br>Plasma creatinine<br>clearance = 7327.7 ±<br>2080.2(ml/min),<br>-1657.5 ±<br>2146.8(ml/min), -16.7<br>± 17.9%, p<0.05 |                                                                                                  |  |  |  |  |

|             |                   |                                             |                                                           |                                                                                |                  |                                                                |                                                                                                                                                                                                  |    |    |
|-------------|-------------------|---------------------------------------------|-----------------------------------------------------------|--------------------------------------------------------------------------------|------------------|----------------------------------------------------------------|--------------------------------------------------------------------------------------------------------------------------------------------------------------------------------------------------|----|----|
| Lecina 2021 | 1 male<br>(42yrs) | 786 km multi-<br>stage ultra-<br>trail race | SCr = 0.88<br>(mg/dL)<br><br>Creatine kinase<br>= 94 UI/L | SCr = 1.13mg/dL<br>(+28.41%)<br><br>Creatine kinase = 1099<br>UI/L (+1069.15%) | ER<br><br>No AKI | Temperature<br>13.08 – 17.69<br>°C<br>humidity<br>60.16–70.87% | Post-race<br>day 2<br>SCr =<br>0.98mg/dL<br>(+11.36%)<br>Creatine kinase<br>= 478 UI/L<br>(+408.51%)<br><br>Day 9<br>SCR =<br>0.84mg/dL<br>(–4.55%)<br>Creatine kinase<br>= 109UI/L<br>(+15.96%) | NS | NS |
|-------------|-------------------|---------------------------------------------|-----------------------------------------------------------|--------------------------------------------------------------------------------|------------------|----------------------------------------------------------------|--------------------------------------------------------------------------------------------------------------------------------------------------------------------------------------------------|----|----|

AKI: acute kidney injury, ER: exertional rhabdomyolysis, EAH: exercise-associated hyponatraemia, NSAIDs: non-steroidal anti-inflammatory drugs, GFR: glomerular filtration rate, SCr: serum creatinine, S-CK: creatinine kinase, BUN: blood urea nitrogen, NGAL: neutrophil gelatinase-associated lipocalin, NS: not specified, Δ: change in
